# Supplementary material for: The regional climate–chemistry–ecology coupling model RegCM-Chem (v4.6)–YIBs (v1.0): development and application
Source: Copernicus journal article supplement (doi:10.5194/gmd-17-3259-2024), 2024-04-26
Supplement: Supplementary file 1 [file gmd-17-3259-2024-supplement.pdf]

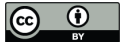

*Supplement of*

## **The regional climate–chemistry–ecology coupling model RegCM-Chem (v4.6)–YIBs (v1.0): development and application**

**Nanhong Xie et al.**

*Correspondence to:* Tijian Wang ([tjwang@nju.edu.cn](mailto:tjwang@nju.edu.cn))

The copyright of individual parts of the supplement might differ from the article licence.

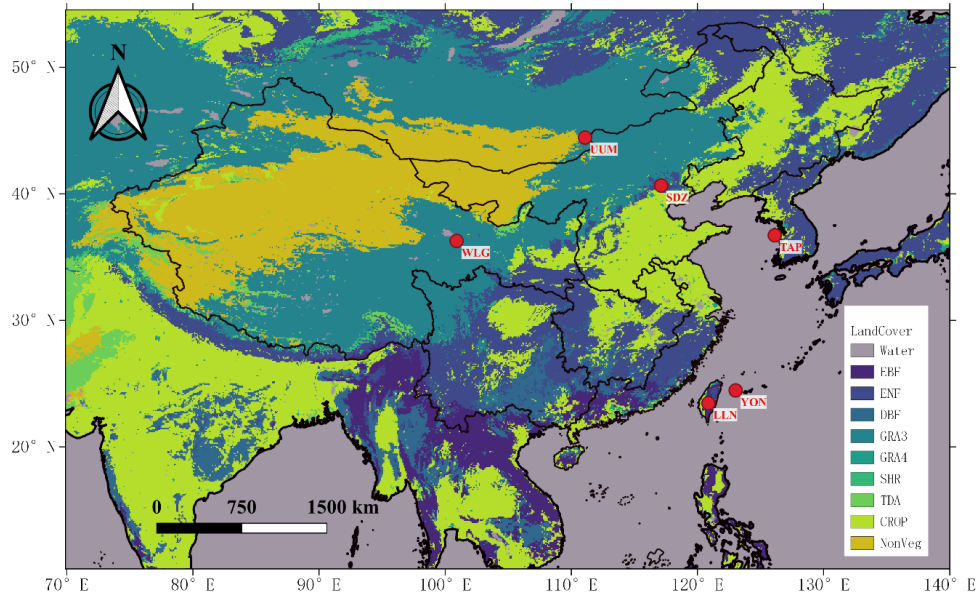

29

30 **Figure S1.** Distribution map of surface vegetation types in the simulated area. Evergreen broad-  
 31 leaved forest (EBF), evergreen coniferous forest (ENF), deciduous broad-leaved forest (DBF), C3  
 32 grassland (GRA3), C4 grassland (GRA4), shrub forest (SHR), tundra (TDA), crops (CROP). The  
 33 red circles indicate the locations of CO<sub>2</sub> observation sites.

34

35

36

37

38

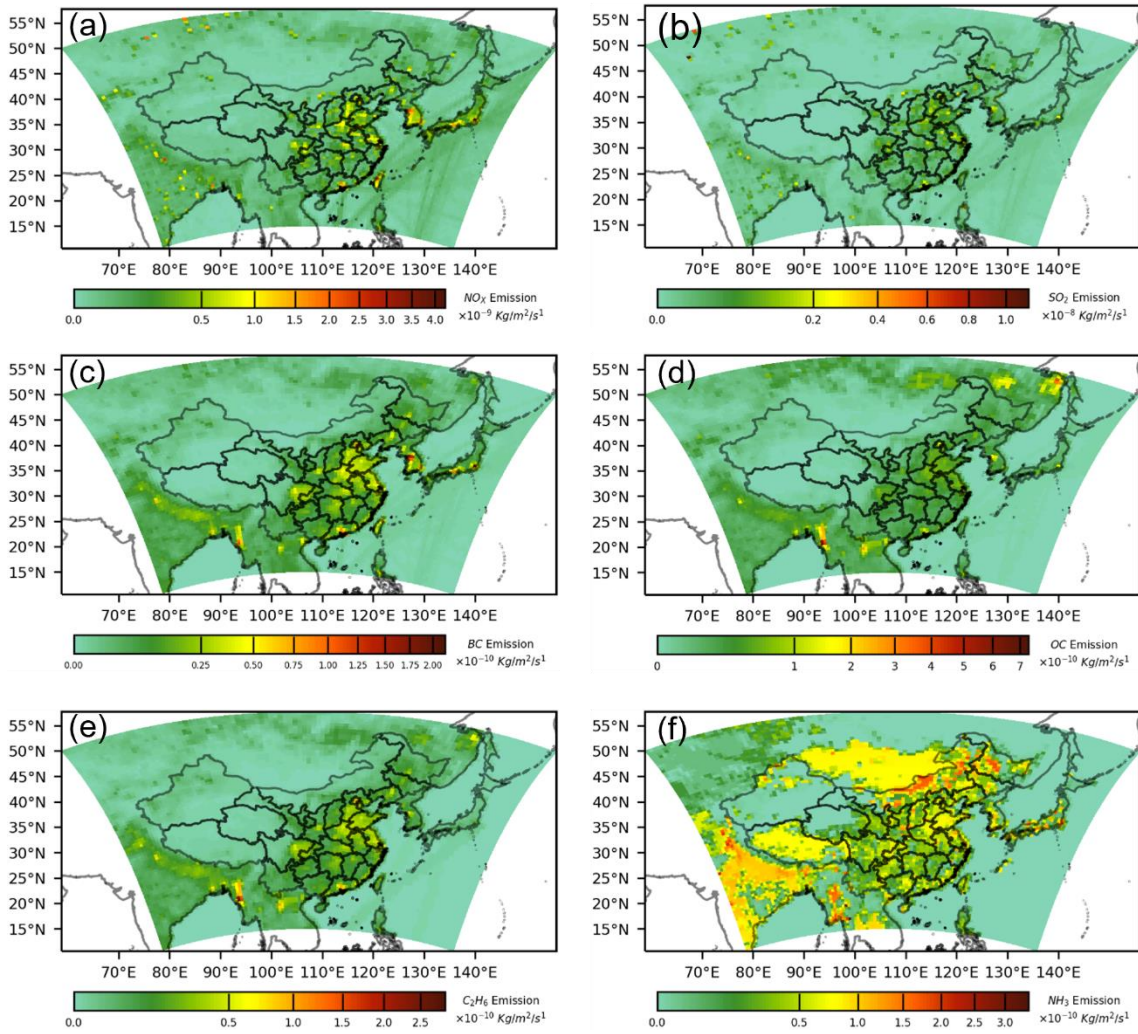

39

40 **Figure S2.** Emission fluxes of main pollutants ( $\text{NO}_x$ (a),  $\text{SO}_2$ (b), BC(c), OC(d),  $\text{C}_2\text{H}_6$ (e),  $\text{NH}_3$ (f))  
 41 in the simulation area. Units:  $\text{Kg m}^{-2} \text{s}^{-1}$ .

42

43

44

45

46

47

48

49

50

51

52

53

54

55

56

57

58

59

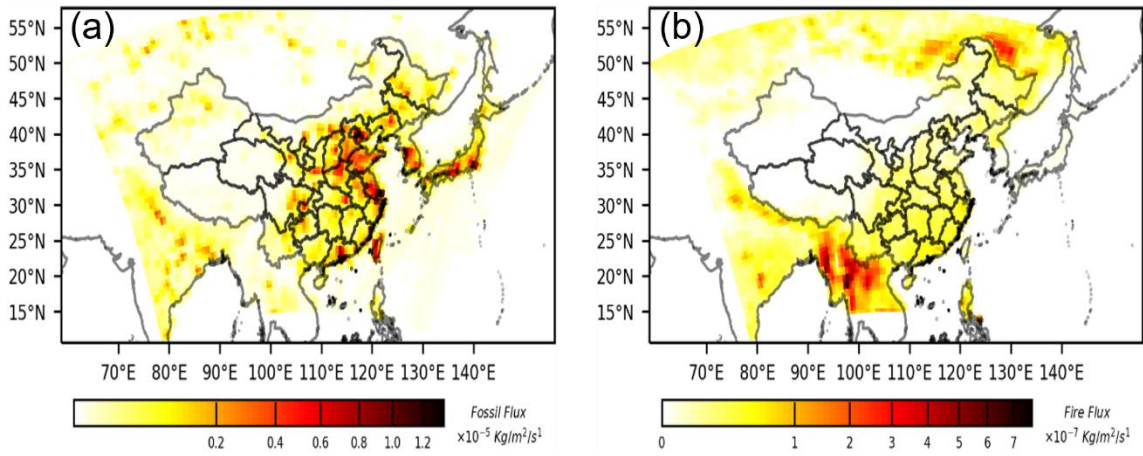

60

61 **Figure S3.** Modeling regional CO<sub>2</sub> emission fluxes from fossil fuel(a) and biomass  
62 combustion(b). Units: Kg m<sup>-2</sup> s<sup>-1</sup>.

63

64

65

66

67

68

69

70

71

72

73

74

75

76

77

78

79

80

81

82

83

84

85

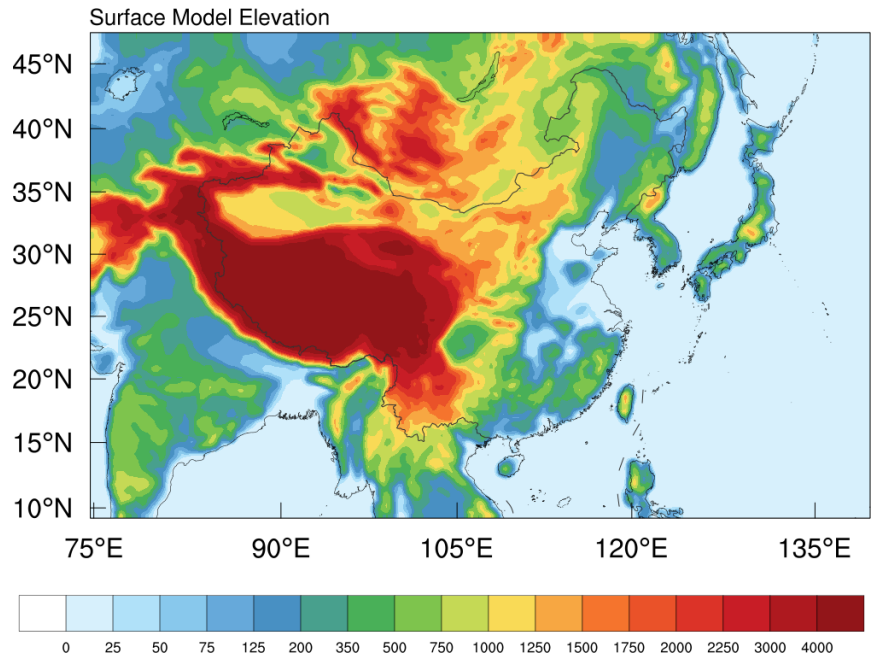

86

87 **Figure S4.** The modelling domain applied and Topographic Elevation (Units: m) in this study.

88

89

90

91

92

93

94

95

96

97

98

99

100

101

102

103

104

105

106

107

108

109

110

111

112

113

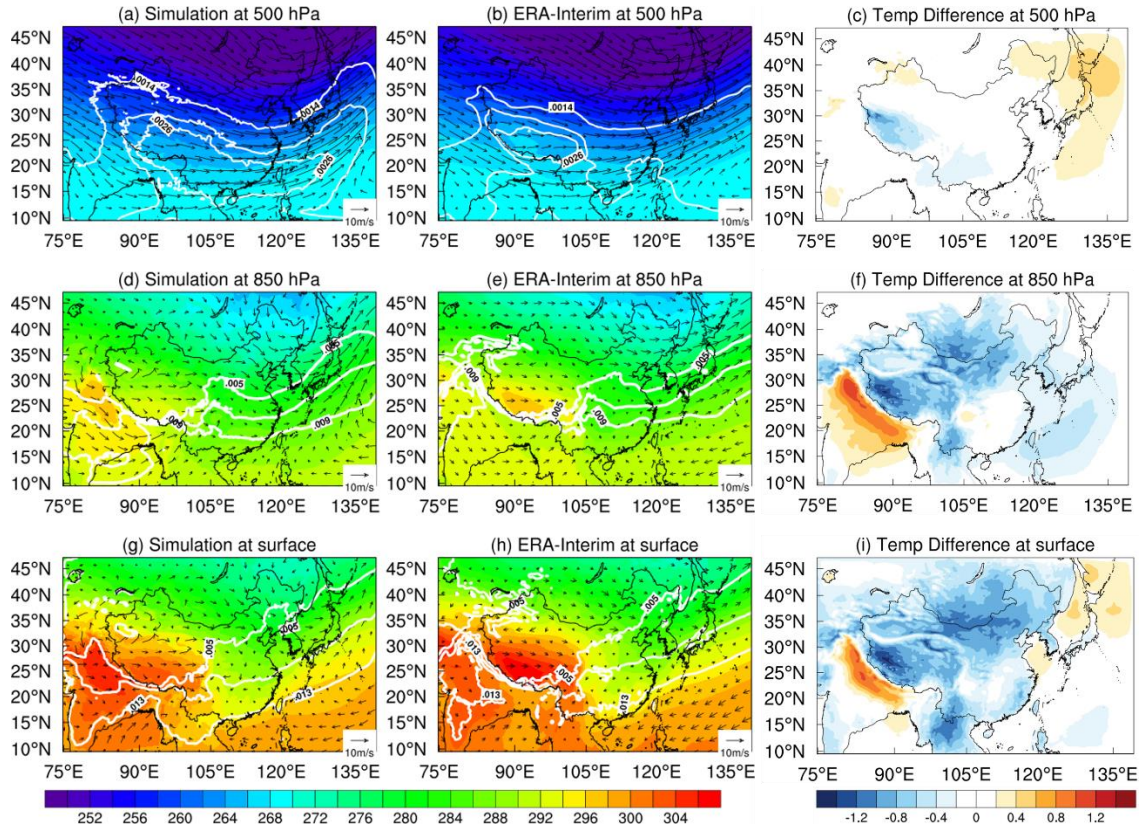

114

115 **Figure S5.** Temperature (color-filled; units: K), specific humidity (contours; units:  $\text{kg kg}^{-1}$ ) and wind  
 116 field (streamlines; units:  $\text{m s}^{-1}$ ) in 2016 at 500 hPa (a, b), 850 hPa (d, e) and near surface (g, h) for the  
 117 model simulation (a, d, g) and ERA-Interim data (b, e, h). The column on the far right shows the  
 118 differences between simulated and observed temperature at 500hPa (c), 850hPa (f), and surface (i).  
 119 The differences are simulation minus observation.

120  
 121  
 122  
 123  
 124  
 125  
 126

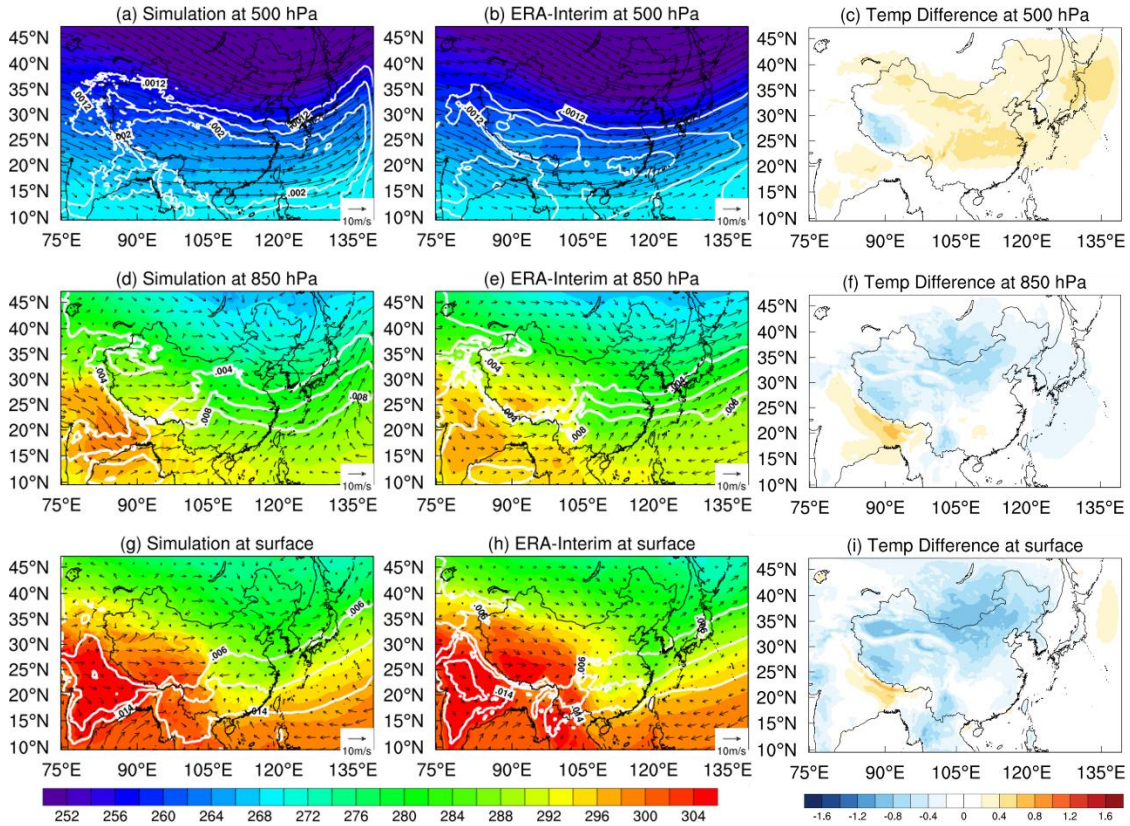

127

128 **Figure S6.** Spring average temperature (color-filled; units: K), specific humidity (contours; units: kg  
 129 kg<sup>-1</sup>) and wind field (streamlines; units: m s<sup>-1</sup>) in 2016 at 500 hPa (a, b), 850 hPa (d, e) and near  
 130 surface (g, h) for the model simulation (a, d, g) and ERA-Interim data (b, e, h). The column on the far  
 131 right shows the differences between simulated and observed temperature at 500hPa (c), 850hPa (f),  
 132 and surface (i). The differences are simulation minus observation. The months we defined as spring  
 133 include March, April and May.

134

135

136

137

138

139

140

141

142

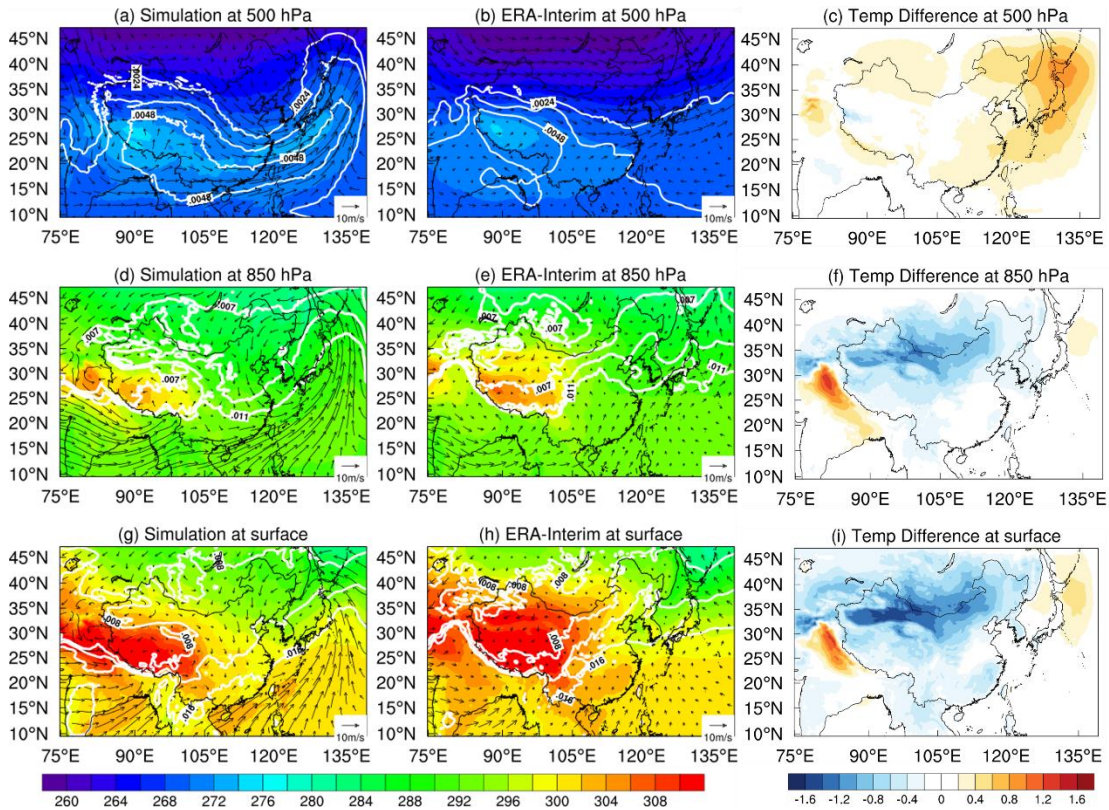

143

144 **Figure S7.** Summer average temperature (color-filled; units: K), specific humidity (contours; units:  
 145  $\text{kg kg}^{-1}$ ) and wind field (streamlines; units:  $\text{m s}^{-1}$ ) in 2016 at 500 hPa (a, b), 850 hPa (d, e) and near  
 146 surface (g, h) for the model simulation (a, d, g) and ERA-Interim data (b, e, h). The column on the far  
 147 right shows the differences between simulated and observed temperature at 500hPa (c), 850hPa (f),  
 148 and surface (i). The differences are simulation minus observation. The months we define as summer  
 149 include June, July and August.

150

151

152

153

154

155

156

157

158

159



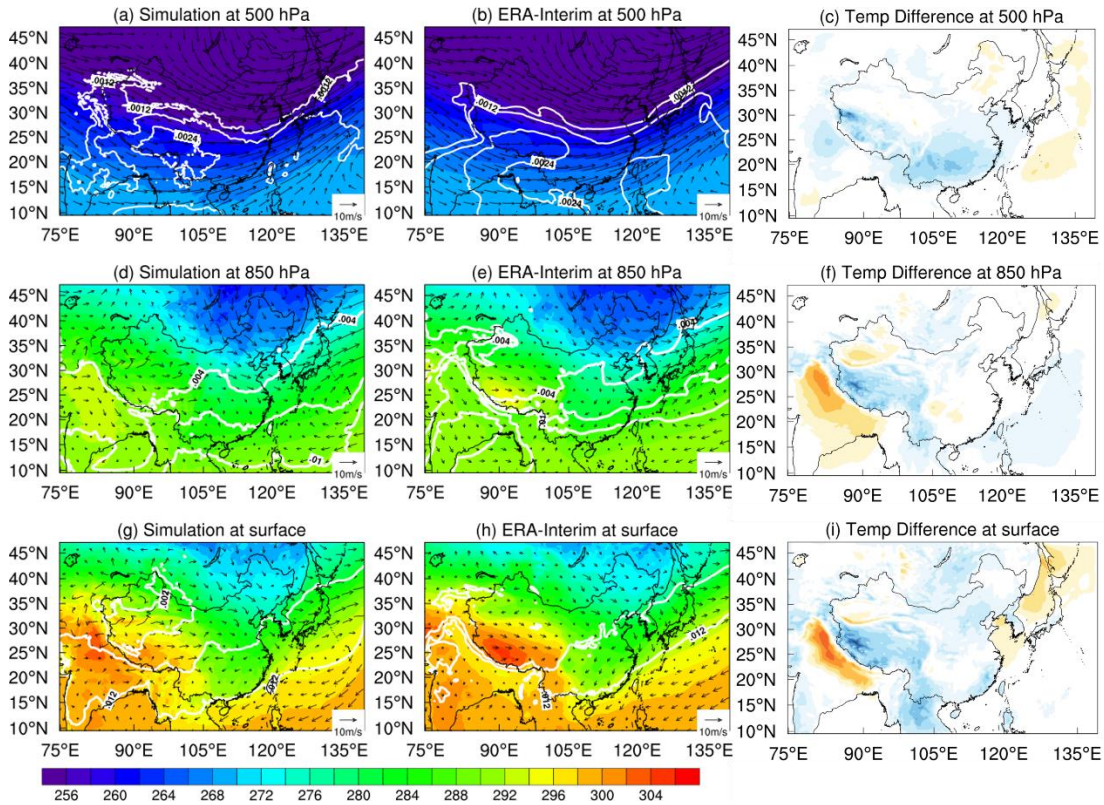

160

161 **Figure S8.** Autumn average temperature (color-filled; units: K), specific humidity (contours; units: kg  
 162  $\text{kg}^{-1}$ ) and wind field (streamlines; units:  $\text{m s}^{-1}$ ) in 2016 at 500 hPa (a, b), 850 hPa (d, e) and near  
 163 surface (g, h) for the model simulation (a, d, g) and ERA-Interim data (b, e, h). The column on the far  
 164 right shows the differences between simulated and observed temperature at 500hPa (c), 850hPa (f),  
 165 and surface (i). The differences are simulation minus observation. The months we define as autumn  
 166 include September, October and November.

167

168

169

170

171

172

173

174

175

176

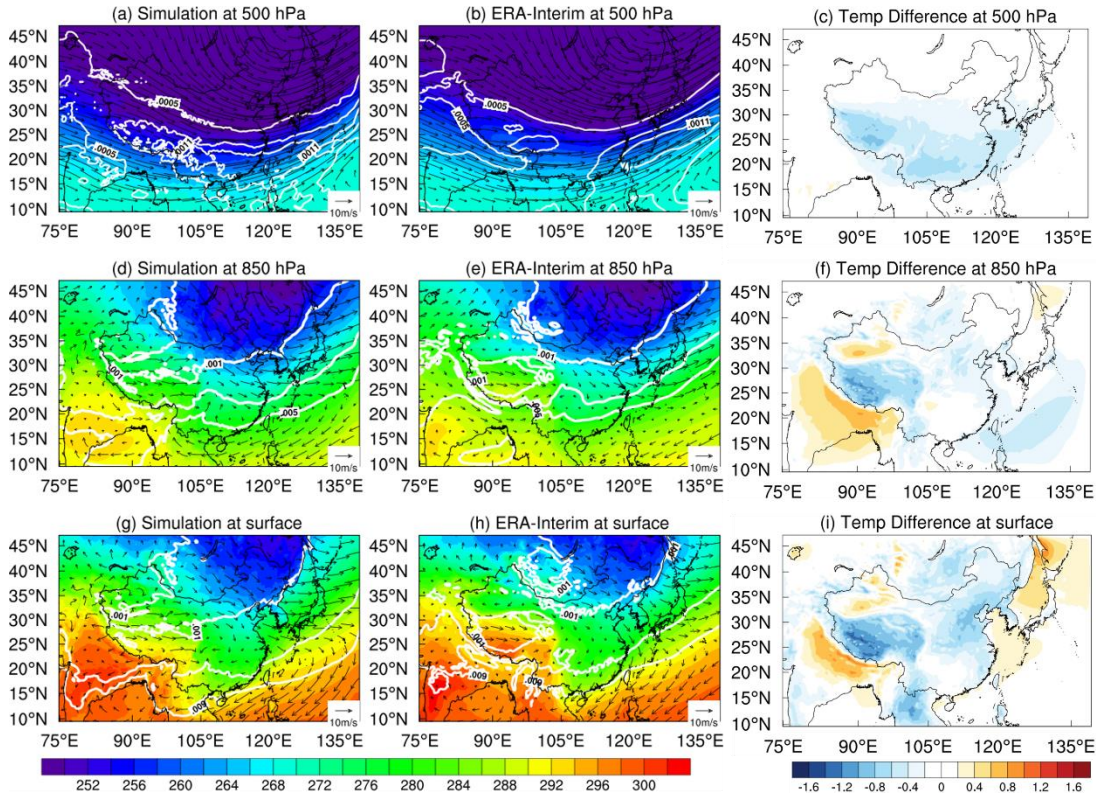

177

178 **Figure S9.** Winter average temperature (color-filled; units: K), specific humidity (contours; units: kg  
 179 kg<sup>-1</sup>) and wind field (streamlines; units: m s<sup>-1</sup>) in 2016 at 500 hPa (a, b), 850 hPa (d, e) and near  
 180 surface (g, h) for the model simulation (a, d, g) and ERA-Interim data (b, e, h). The column on the far  
 181 right shows the differences between simulated and observed temperature at 500hPa (c), 850hPa (f) and  
 182 surface (i). The differences are simulation minus observation. The months we define as winter include  
 183 January, February and December.

184

185

186

187

188

189

190

191

192

193

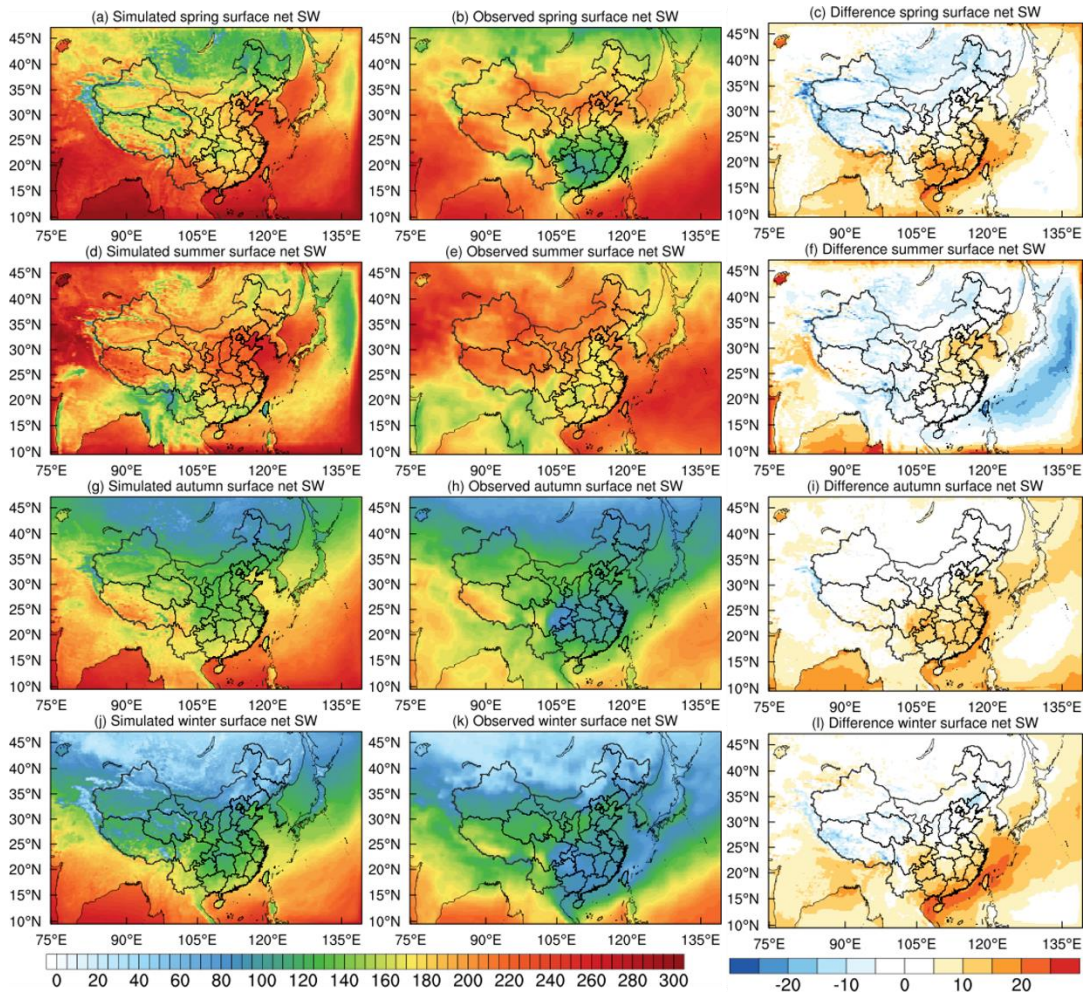

194

195 **Figure S10.** Spring (a, b), summer (d, e), autumn (g, h), winter (j, k) four season model simulations (a,  
 196 d, g, j) and satellite retrieval (b, e, h, k) in 2016 surface net shortwave radiation flux. The column on  
 197 the far right shows the difference between simulations and observations for spring(c), summer(f),  
 198 autumn(i), and winter(l). The differences are simulation minus observation. Units:  $W m^{-2}$ .

199

200

201

202

203

204

205

206

207

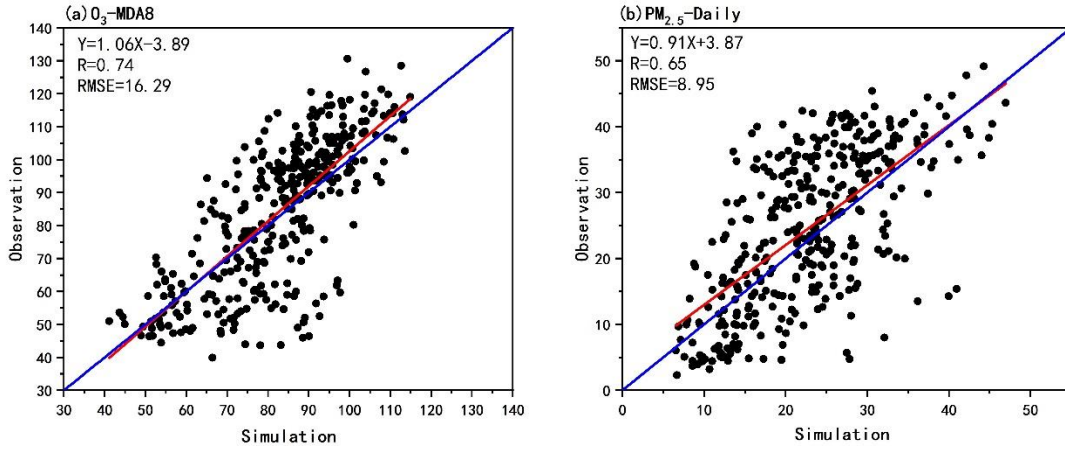

208

209 **Figure S11.** Scatter plot of simulated and observed for  $O_3$  (a) and  $PM_{2.5}$ (b) Units:  $\mu g m^{-3}$

210

211

212

213

214

215

216

217

218

219

220

221

222

223

224

225

226

227

228

229

230

231

232

233

234

235

236

237

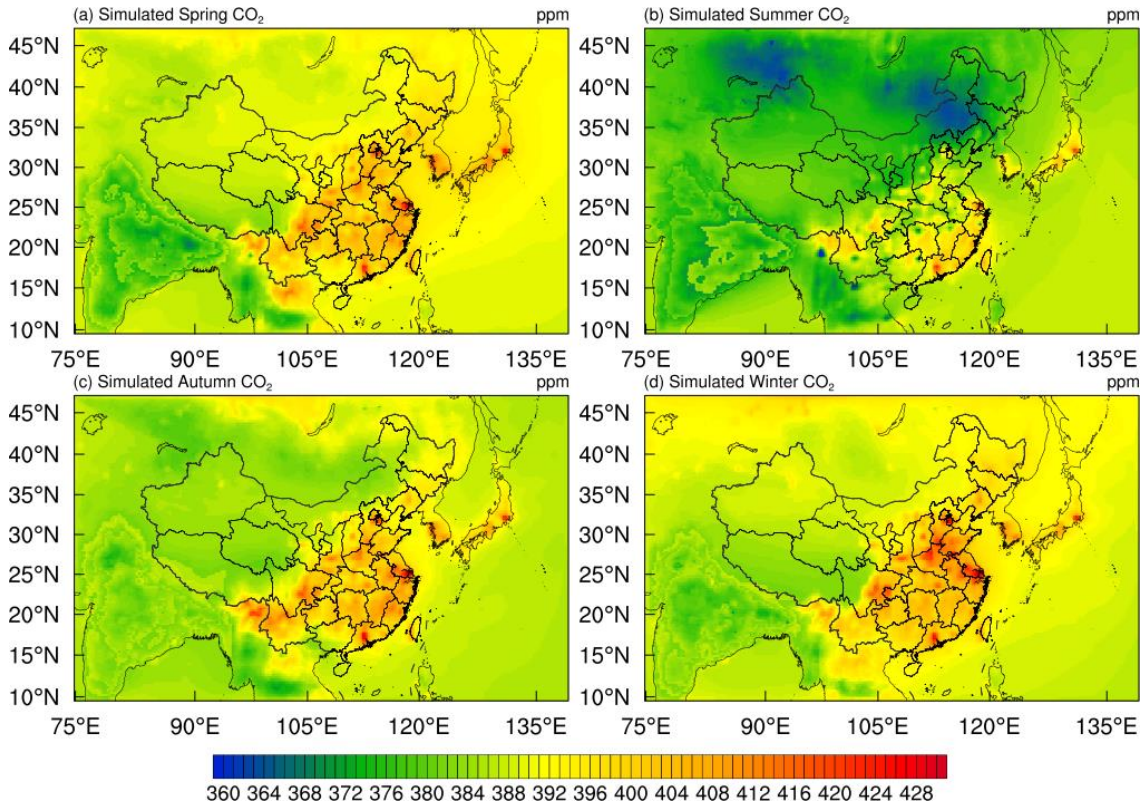

238

239 **Figure S12.** Spatial distribution of CO<sub>2</sub> simulated by model of spring(a), summer(b), autumn(c) and  
 240 winter(d) in 2016. Units: ppm

241  
 242  
 243  
 244  
 245  
 246  
 247  
 248  
 249  
 250  
 251  
 252  
 253  
 254  
 255  
 256  
 257  
 258  
 259  
 260  
 261  
 262  
 263

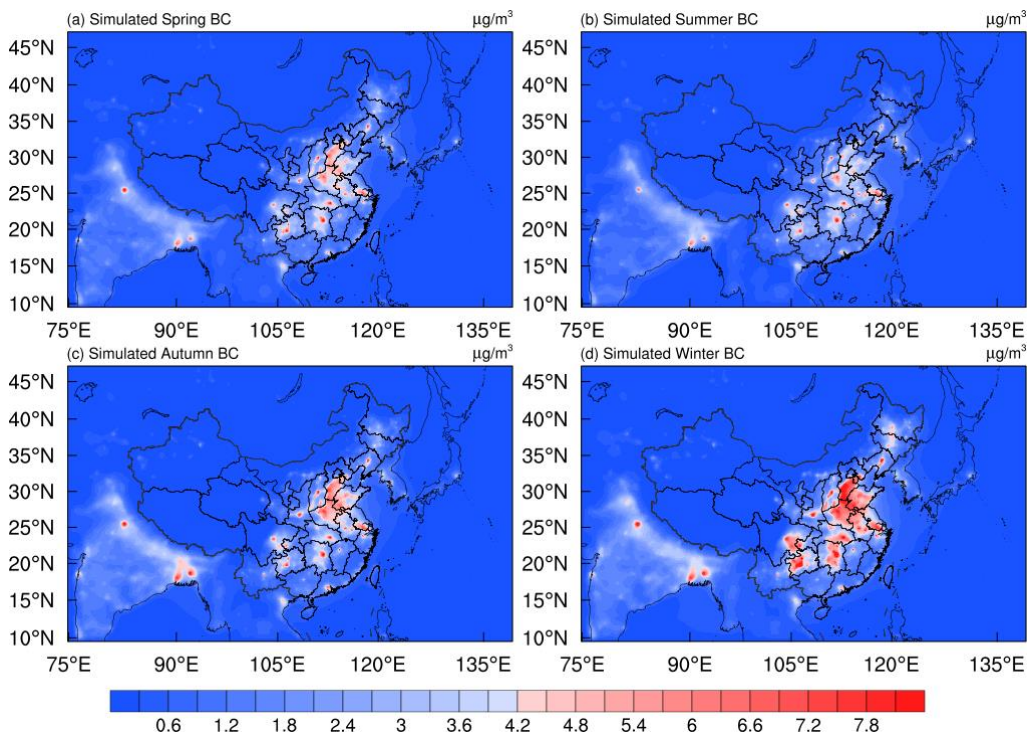

264

265 **Figure S13.** Spatial distribution of BC simulated by four season models of spring(a), summer(b),  
 266 autumn(c) and winter(d) in 2016. Units:  $\mu\text{g m}^{-3}$

267  
 268  
 269  
 270  
 271  
 272  
 273  
 274  
 275  
 276  
 277  
 278  
 279  
 280  
 281  
 282  
 283  
 284  
 285  
 286  
 287  
 288  
 289

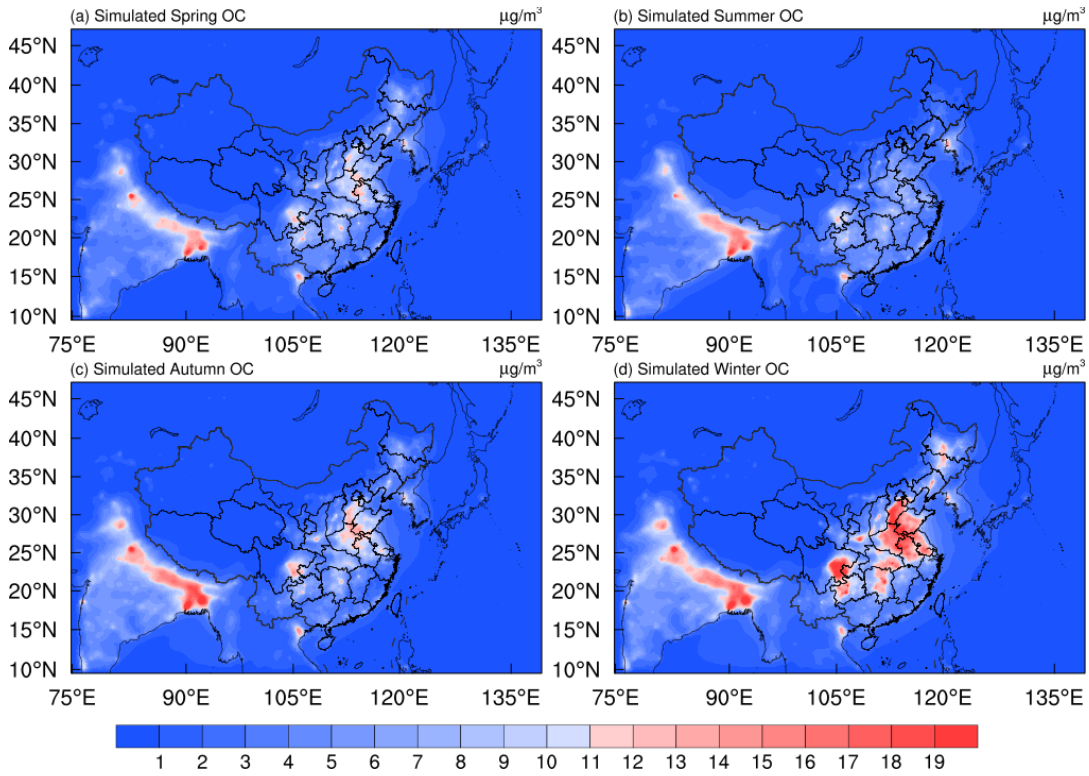

290

291 **Figure S14.** Spatial distribution of OC simulated by four season models of spring(a), summer(b),  
 292 autumn(c) and winter(d) in 2016. Units:  $\mu\text{g m}^{-3}$

293

294

295

296

297

298

299

300

301

302

303

304

305

306

307

308

309

310

311

312

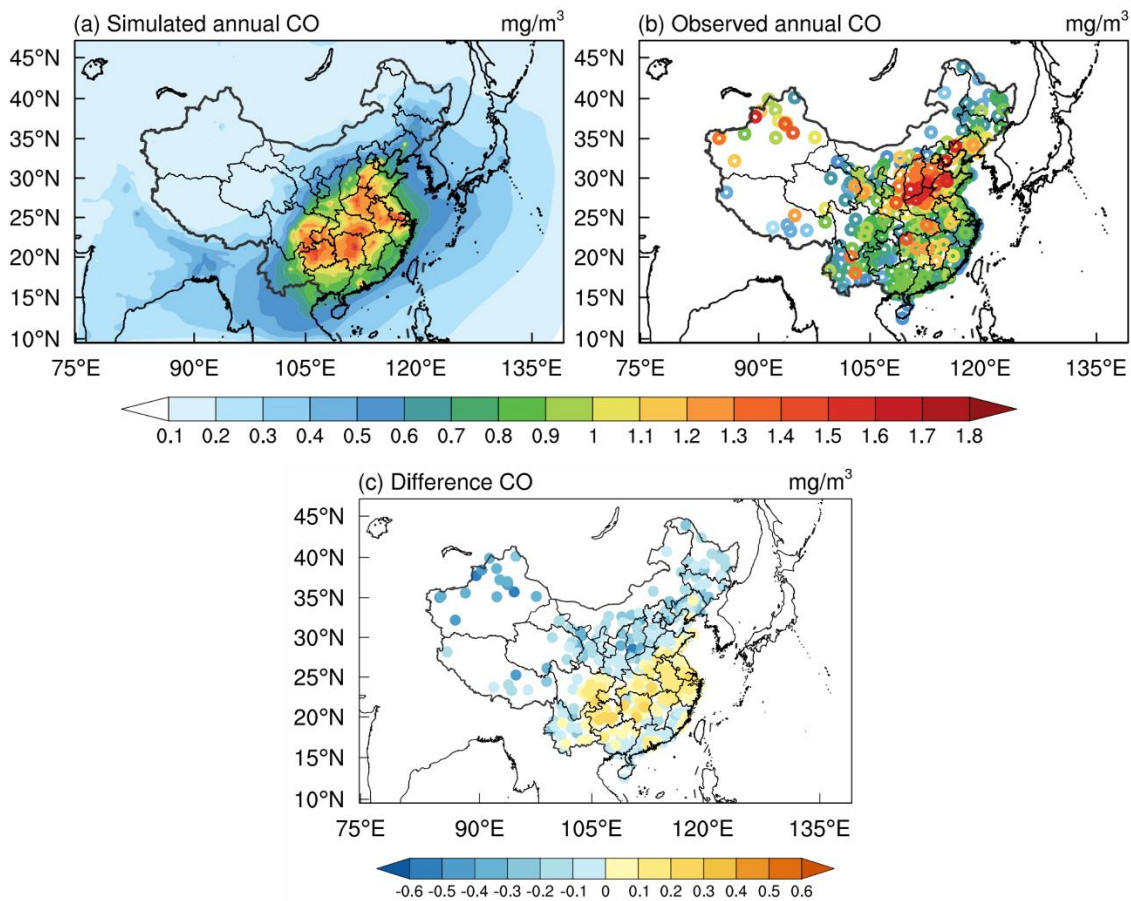

313

314 **Figure S15.** Comparisons of simulations (a) and observations (b) and their differences (c) for CO  
 315 across China. Colored circles show station observations. The differences are simulation minus  
 316 observation. Units:  $\text{mg m}^{-3}$ .

317

318

319

320

321

322

323

324

325

326

327

328

329

330

331

332

333

334

335

336



337  
338  
339  
340

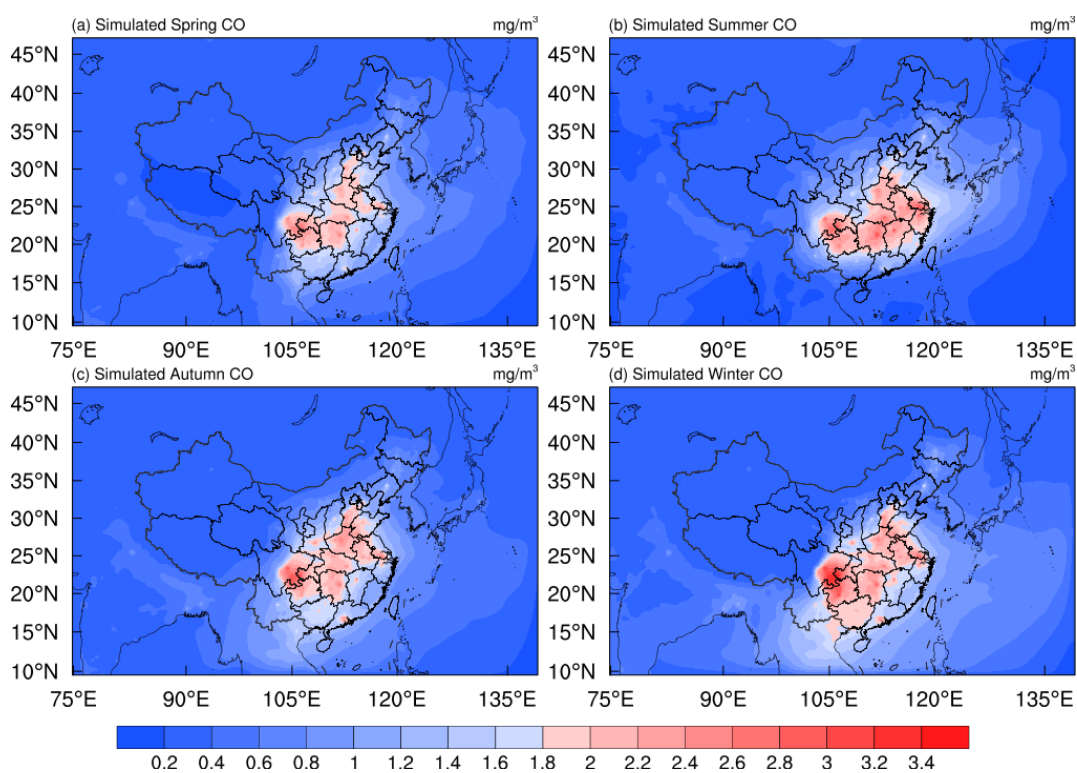

341

342 **Figure S16.** Spatial distribution of CO simulated by four season models of spring(a), summer(b),  
343 autumn(c) and winter(d) in 2016. Units: mg m<sup>-3</sup>

344  
345  
346  
347  
348  
349  
350  
351  
352  
353  
354  
355  
356  
357  
358  
359  
360  
361  
362  
363

364  
365

366 **Table S1.** Statistical metrics for surface O<sub>3</sub> and PM<sub>2.5</sub> concentration

| Variables                | R    | MB    | ME    | NMB    | NME    | RMSE  |
|--------------------------|------|-------|-------|--------|--------|-------|
| O <sub>3</sub> _MDA8     | 0.74 | -1.47 | 11.61 | 0.0235 | 0.1577 | 16.29 |
| PM <sub>2.5</sub> _Daily | 0.65 | -1.80 | 7.21  | 0.1380 | 0.4211 | 8.95  |

367 (Abbreviated meaning: correlation coefficients (R), mean biases(MB), mean error (ME), normal mean  
368 biases (NMB), normal mean error (NME), and root mean square error (RMSE). MB, ME and RMSE  
369 units:  $\mu\text{g m}^{-3}$ )

370  
371  
372  
373

374 **Table S2.** Comparison between Observation and simulation carbon fluxes

| Variables | R    | MB   | ME   | RMSE |
|-----------|------|------|------|------|
| GPP       | 0.91 | 0.13 | 0.22 | 0.40 |
| NPP       | 0.87 | 0.05 | 0.12 | 0.22 |

375 (The abbreviation definitions R, MB, ME, and RMSE are consistent with Table S1. MB, ME and  
376 RMSE units:  $\text{Kg C m}^{-2} \text{ year}^{-1}$ )

377  
378  
379  
380
